# Supplementary material for: Immunopathology of SARS-CoV-2 Infection: A Focus on T Regulatory and B Cell Responses in Children Compared with Adults
Source: MDPI journal article supplement (doi:10.3390/children9050681), 2022-05-07
Supplement: s1 [file s1]

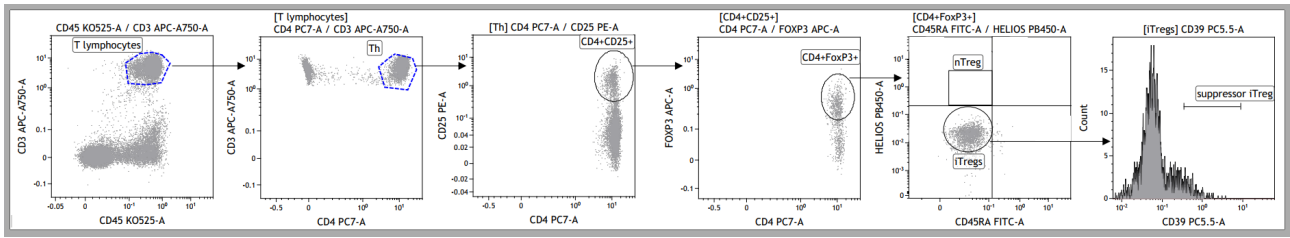

**Figure S1.** Example of Treg gate strategy partially derived from manufacturer's protocol.

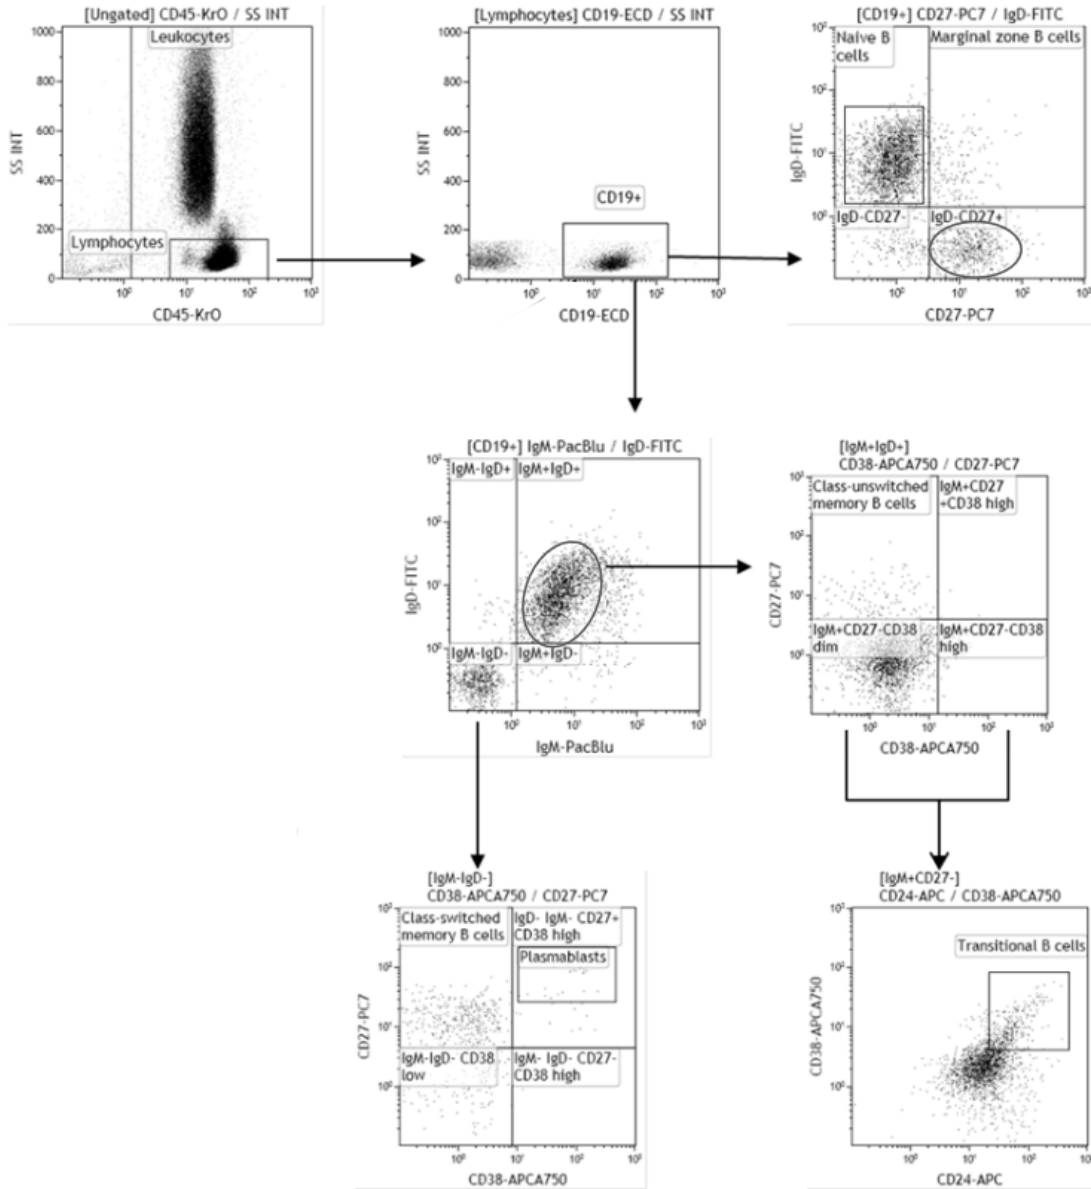

**Figure S2.** Example of B cell subsets gate strategy derived from manufacturer's protocol.

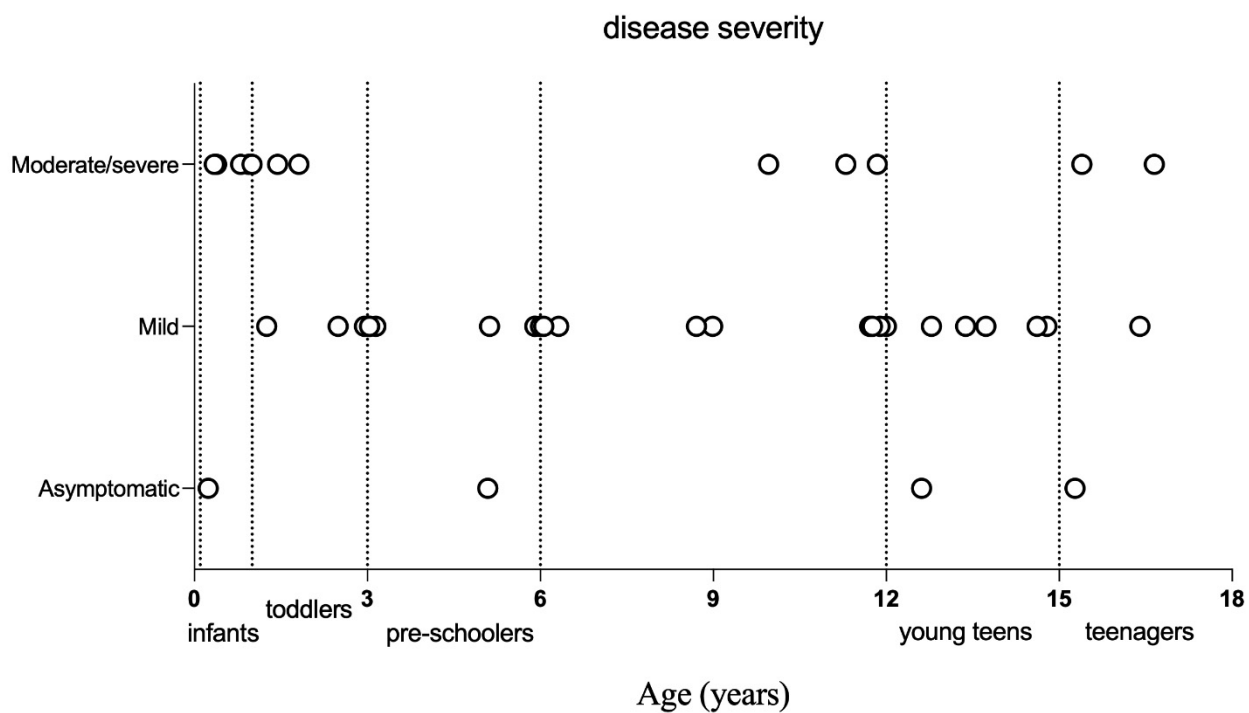

**Figure S3.** Disease severity of children with CoV2 infection, according to age.

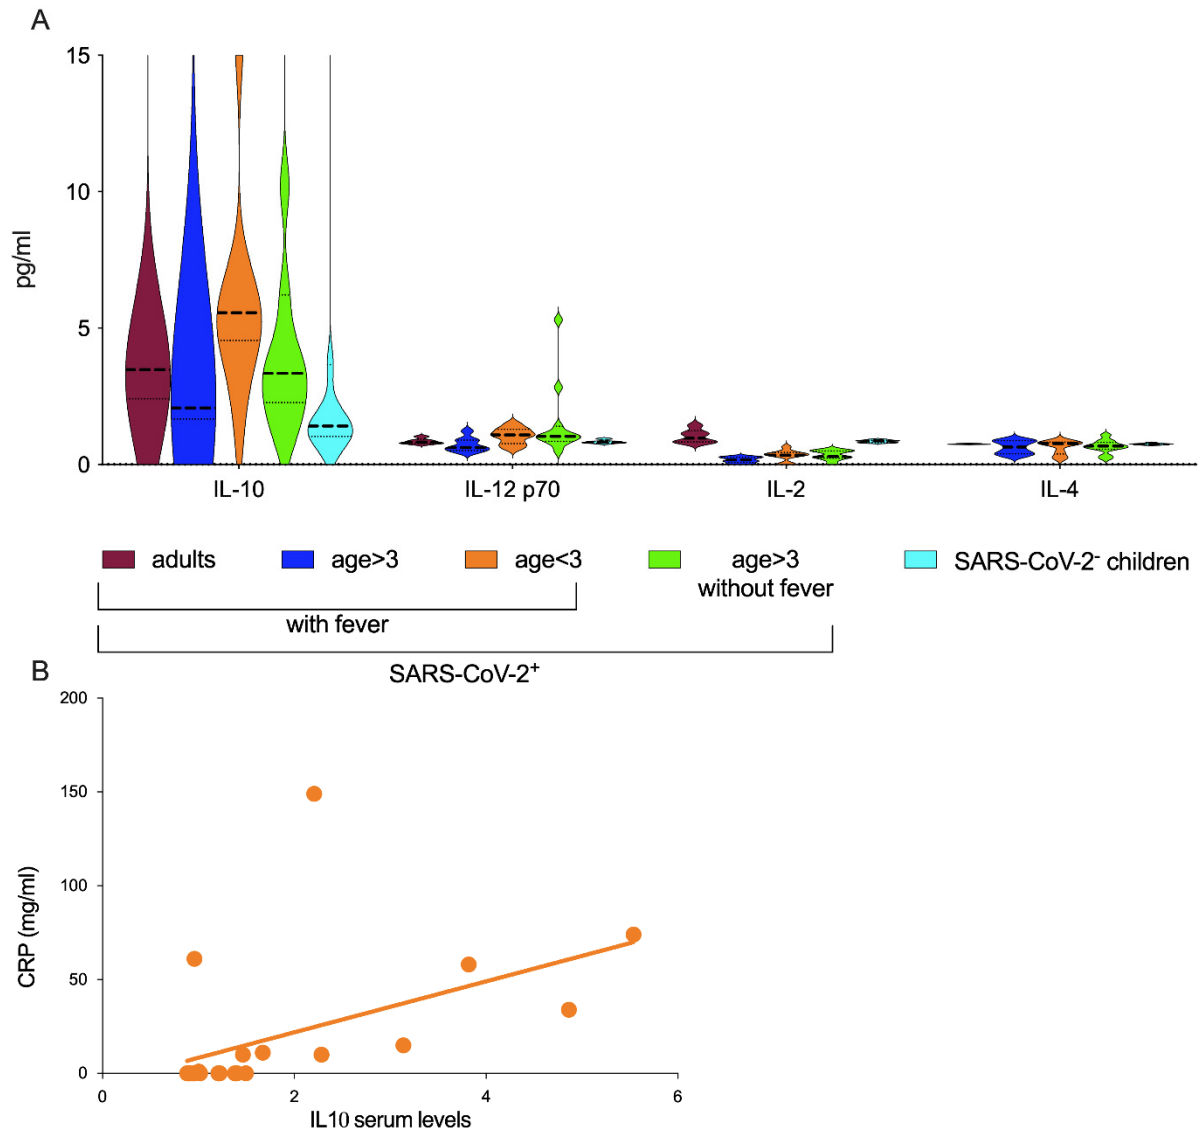

**Figure S4.** Serum cytokine levels. IL10, IL12p70, IL2 and IL4 levels were measured in sera samples of patients at data entry, using ELLA Assay (A). (B) shows correlation between C-Reactive Protein and Interleukin 10 levels.
